# Supplementary material for: Sex-Specific Neurodevelopmental Outcomes Among Offspring of Mothers With SARS-CoV-2 Infection During Pregnancy
Source: PubMed Central journal article supplement (PMC10037162; doi:10.1001/jamanetworkopen.2023.4415), 2023-03-23
Supplement: jamanetwopen-e234415-s001.pdf [file jamanetwopen-e234415-s001.pdf]

## Supplementary Online Content

Edlow AG, Castro VM, Shook LL, Haneuse S, Kaimal AJ, Perlis RH. Sex-specific neurodevelopmental outcomes among offspring of mothers with SARS-CoV-2 infection during pregnancy. *JAMA Netw Open*. 2023;6(3):e234415.  
doi:10.1001/jamanetworkopen.2023.4415

**eMethods.** Analysis

**eResults.** Sensitivity Analyses

**eTable 1.** Comparison of Features of Offspring by Availability of Maternal SARS-CoV-2 PCR Results During Pregnancy

**eTable 2.** Neurodevelopmental Diagnostic Codes Observed Among SARS-CoV-2 Exposed and Unexposed Offspring at 12 Months (Top) and 18 Months (Bottom)

**eTable 3.** Sociodemographic and Baseline Clinical Characteristics of Mothers Who Were SARS-CoV-2 Positive or Negative Included in the Pandemic Cohort (March 2020 to May 2021)

**eTable 4.** Sociodemographic and Baseline Clinical Characteristics of Offspring of Mothers Who Were SARS-CoV-2 Positive or Negative Included in the Pandemic Cohort (March 2020 to May 2021), Restricted to Offspring With at Least 1 Follow-up Visit at 12 Months  $\pm$  60 Days

**eTable 5.** Coarsened Exact Matching of Mothers With or Without SARS-CoV-2 Exposure

**eTable 6.** Sociodemographic and Baseline Clinical Characteristics of Offspring With Mothers Who Were SARS-CoV-2 Positive or Negative Included in the Pandemic Cohort (March 2020 to May 2021), Restricted to Offspring With at Least 1 Follow-up Visit at 18 Months  $\pm$  60 Days

**eTable 7.** Sociodemographic and Baseline Clinical Characteristics of Offspring Who Were Born During the Pandemic (March 2020 to May 2021), Compared With Those Born in 2018

**eTable 8.** Neurodevelopmental Diagnostic Codes of Offspring Who Were Born During the Pandemic (March 2020 to May 2021), Compared With Those Born in 2018 or 2019

**eTable 9.** Sociodemographic and Baseline Clinical Characteristics of Offspring Who Were Born During the Pandemic (March 2020 to May 2021), Compared With Those Born in 2019

**eFigure 1.** Multiple Logistic Regression Forest Plot of Neurodevelopmental Diagnosis Within 12 Months in Offspring Associated With Maternal COVID-19 Status, Without Adjustment for Preterm Birth

**eFigure 2.** Multiple Logistic Regression Forest Plot of Neurodevelopmental Diagnosis Within 12 Months in Offspring Associated With Maternal COVID-19 Status, With Cohort Restricted to Offspring With at Least 1 Follow-up Visit at 12 Months  $\pm$  60 Days

**eFigure 3.** Multiple Logistic Regression Forest Plot of Neurodevelopmental Diagnosis Within 18 Months in Offspring Associated With Maternal COVID-19 Status, Without Adjustment for Preterm Birth

**eFigure 4.** Multiple Logistic Regression Forest Plot of Neurodevelopmental Diagnosis Within 18 Months in Offspring Associated With Maternal COVID-19 Status, With Cohort Restricted to Offspring With at Least 1 Follow-up Visit at 18 Months  $\pm$  60 Days

**eFigure 5.** Multiple Logistic Regression Forest Plot of Neurodevelopmental Diagnosis Within 12 Months in Offspring Associated With Period of Birth (Pandemic vs 2018)

**eFigure 6.** Multiple Logistic Regression Forest Plot of Neurodevelopmental Diagnosis Within 12 Months in Offspring Associated With Period of Birth (Pandemic vs 2019)

This supplementary material has been provided by the authors to give readers additional information about their work.

## **eMethods. Analysis**

In sensitivity analyses, we repeated the primary outcome analyses confining the analyses to only those offspring who had a 12-month visit within our hospital system (with a 60-day window before or after the 12-month mark), to understand whether associations could be confounded by differential in-person follow-up among exposed or unexposed offspring. We also performed a sensitivity analysis including only offspring with an 18-month visit within our hospital system, again with a 60-day window before and after the 18-month mark.

To examine the robustness of multiple regression results by applying an alternative approach to potential confounding variables, we also applied exact matching to match each SARS-CoV-2-exposed offspring with at least one SARS-CoV-2-unexposed offspring on the same features used in regression models (i.e., race, ethnicity, maternal age, insurance type, hospital type, and preterm delivery). Where regression models estimate an average treatment effect, the matched cohort provides an approximation of the average treatment (i.e., exposure) effect among exposed individuals. We used the R *matchit* (v4.4.0) package for these analyses, allowing as many exact matches among controls as available – i.e., 1:n matching – to maximize precision in estimates of effect. Allowing more than 1 match for each exposed case where available (rather than 1:1) allows greater power to detect association given the larger available pool of controls. To quantify the effect of misclassification of exposure on estimates of association<sup>30</sup>, we used the R *episensr* package (v1.1.0).

## **eResults. Sensitivity Analyses**

In sensitivity analyses, we also fit logistic regression models with the cohort restricted to offspring with at least one follow-up visit within our hospital system at 12 months (Supplemental Table 4; n=383 SARS-CoV-2 exposed and 6635 unexposed, including 26/383 (6.8%) and 309/6635 (4.7%) with a neurodevelopmental diagnosis, respectively). These models supported the robustness of the primary analysis, yielding results of similar magnitude to those of the full cohort: adjusted OR was 1.76 (1.00-2.94), p=.04 for males, 0.82 (0.36-1.66, p=.61) for females, and 1.31 (0.83-1.99, p=.22) for both sexes combined (Supplemental Figures 2A, B, and C).

To further examine the robustness of these associations, we used exact matching on the same features as regression – maternal age, race, ethnicity, insurance status; hospital type; and preterm status—to examine the association between offspring SARS-CoV-2 exposure and neurodevelopmental diagnosis. Among males, matching 397 COVID-exposed offspring with 6055 COVID-unexposed offspring, OR for any neurodevelopmental disorder at 12 months was 1.88 (95% CI 1.05-3.37; p=.04), and for female offspring matching 382 COVID-exposed to 5803 COVID-unexposed, OR was 1.22 (0.51-2.47, p=.6). For the cohort as a whole, matching 779 COVID-exposed offspring with 11858 COVID-unexposed offspring, OR was 1.56 (95% CI 0.95-2.41; p=.06). Applying coarsened exact matching rather than exact matching did not was consistent with initial results; see Supplemental Table 5. These sensitivity analyses demonstrated consistent direction of effect across both matched analyses and logistic regression models.

We also tested for the presence of secular trends in diagnosis of neurodevelopmental disorders by comparing 12-month outcomes among children born during the pandemic to two pre-pandemic cohorts. These analyses were all conducted based on birth during versus pre-pandemic, and did not take into account maternal SARS-CoV-2 status. Compared to 2018 (Supplemental Table 7, all children followed up pre-pandemic), a modest but not statistically significant increase in rates of neurodevelopmental diagnoses

(Supplemental Table 8) was identified among males (adjusted OR 1.11, 95% CI 0.89-1.39),  $p=.37$ ) as well as females (adjusted OR 1.28, 95% CI 0.99-1.66),  $p=.06$ ); analyses pooling both sexes also failed to meet statistical significance adjusted OR=1.18, 95% CI 0.99-1.39,  $p=.06$ ; Supplemental Figures 5A, B, and C). Compared to the 2019 pre-pandemic cohort (Supplemental Table 9), all children born pre-pandemic but all with 12-month follow-up intra-pandemic), for children born during the pandemic, adjusted OR for neurodevelopmental diagnoses at 12 months among male offspring was 1.24, 95% CI 0.99-1.56,  $p=.06$ ; for females, 1.26, 95% CI 0.98-1.62,  $p=.08$ ; analyses pooling both sexes, 1.24, 95% CI 1.05-1.47,  $p=.01$  (Supplemental Figures 6A, B, and C).

**eTable 1.** Comparison of Features of Offspring by Availability of Maternal SARS-CoV-2 PCR Results During Pregnancy

| Characteristic                                                | SARS-COV-2 PCR available<br>N=18355 | SARS-COV-2 PCR not available<br>N=2054 | p-value <sup>1</sup> |
|---------------------------------------------------------------|-------------------------------------|----------------------------------------|----------------------|
| <b>Delivery hospital type, n (%)</b>                          |                                     |                                        | 0.36                 |
| Academic medical center                                       | 10,809 (59)                         | 1,231 (60)                             |                      |
| Community hospital                                            | 7,546 (41)                          | 823 (40)                               |                      |
| <b>Maternal age, Median (IQR)</b>                             | 33.0 (30.0 – 36.0)                  | 33.0 (30.0 – 36.0)                     | 0.24                 |
| <b>Maternal race, n (%)</b>                                   |                                     |                                        | 0.44                 |
| Asian                                                         | 1,809 (9.9)                         | 216 (11)                               |                      |
| Black or African American                                     | 1,635 (8.9)                         | 184 (9.0)                              |                      |
| Other                                                         | 1,714 (9.3)                         | 186 (9.1)                              |                      |
| Unknown                                                       | 479 (2.6)                           | 66 (3.2)                               |                      |
| White                                                         | 12,718 (69)                         | 1,402 (68)                             |                      |
| <b>Maternal ethnicity, n (%)</b>                              |                                     |                                        | 0.12                 |
| Hispanic                                                      | 2,617 (14)                          | 284 (14)                               |                      |
| Not Hispanic                                                  | 15,213 (83)                         | 1,695 (83)                             |                      |
| Unavailable                                                   | 517 (2.8)                           | 74 (3.6)                               |                      |
| Unknown                                                       | 8                                   | 1                                      |                      |
| <b>Offspring sex, n (%)</b>                                   |                                     |                                        | 0.24                 |
| Female                                                        | 8,956 (49)                          | 1,030 (50)                             |                      |
| Male                                                          | 9,399 (51)                          | 1,024 (50)                             |                      |
| <b>Maternal public insurance, n (%)</b>                       | 3,593 (20)                          | 376 (18)                               | 0.17                 |
| <b>Delivery method, n (%)</b>                                 |                                     |                                        | 0.30                 |
| C-Section                                                     | 6,031 (33)                          | 698 (34)                               |                      |
| Vaginal                                                       | 12,324 (67)                         | 1,356 (66)                             |                      |
| <b>Pre-term birth, n (%)</b>                                  |                                     |                                        | 0.93                 |
| Preterm                                                       | 1,857 (10)                          | 209 (10)                               |                      |
| Term                                                          | 16,498 (90)                         | 1,845 (90)                             |                      |
| <b>Delivery admission length of stay (days), Median (IQR)</b> | 3.00 (2.00 – 4.00)                  | 3.00 (2.00 – 4.00)                     | 0.026                |
| <b>Multiple births, n (%)</b>                                 | 1,170 (6.4)                         | 156 (7.6)                              | 0.033                |
| <b>Pandemic delivery period, n (%)</b>                        |                                     |                                        | <0.001               |
| 2020-1 Mar - May 2020                                         | 2,139 (12)                          | 1,917 (93)                             |                      |
| 2020-2 Jun - Aug 2020                                         | 4,411 (24)                          | 20 (1.0)                               |                      |
| 2020-3 Sep - Nov 2020                                         | 3,926 (21)                          | 20 (1.0)                               |                      |
| 2020-4 Dec 2020 - Feb 2021                                    | 3,522 (19)                          | 25 (1.2)                               |                      |
| 2021-5 Mar - May 2021                                         | 4,357 (24)                          | 72 (3.5)                               |                      |

<sup>1</sup>Pearson's Chi-squared test; Wilcoxon rank sum test

**eTable 2.** Neurodevelopmental Diagnostic Codes Observed Among SARS-CoV-2 Exposed and Unexposed Offspring at 12 Months (Top) and 18 Months (Bottom)

| ICD-10-CM code | ICD-10-CM description                                      | Pregnancy SARS-COV-2 Negative |                |                  | Pregnancy SARS-COV-2 Positive |                |                  |
|----------------|------------------------------------------------------------|-------------------------------|----------------|------------------|-------------------------------|----------------|------------------|
|                |                                                            | All offspring                 | Male offspring | Female offspring | All offspring                 | Male offspring | Female offspring |
| F82            | Specific developmental disorder of motor function          | 175                           | 85             | 90               | 20                            | 12             | 8                |
| F80.9          | Developmental disorder of speech and language, unspecified | 75                            | 52             | 23               | 5                             | <5             | <5               |
| F89            | Unspecified disorder of psychological development          | 80                            | 44             | 36               | <5                            | <5             | <5               |
| F80.1          | Expressive language disorder                               | 42                            | 32             | 10               | <5                            | <5             | 0                |
| F88            | Other disorders of psychological development               | 13                            | 9              | <5               | <5                            | <5             | <5               |
| F80.2          | Mixed receptive-expressive language disorder               | <5                            | <5             | <5               | <5                            | <5             | 0                |
| F80.0          | Phonological disorder                                      | <5                            | 0              | <5               | 0                             | 0              | 0                |
| F80.4          | Speech and language development delay due to hearing loss  | <5                            | <5             | 0                | 0                             | 0              | 0                |
| F80.89         | Other developmental disorders of speech and language       | <5                            | <5             | 0                | 0                             | 0              | 0                |

| ICD-10-CM code | ICD-10-CM description                                      | Pregnancy SARS-COV-2 Negative |                |                  | Pregnancy SARS-COV-2 Positive |                |                  |
|----------------|------------------------------------------------------------|-------------------------------|----------------|------------------|-------------------------------|----------------|------------------|
|                |                                                            | All offspring                 | Male offspring | Female offspring | All offspring                 | Male offspring | Female offspring |
| F80.1          | Expressive language disorder                               | 248                           | 168            | 80               | 9                             | 7              | <5               |
| F80.9          | Developmental disorder of speech and language, unspecified | 211                           | 144            | 67               | 23                            | 15             | 8                |
| F82            | Specific developmental disorder of motor function          | 219                           | 104            | 115              | 21                            | 13             | 8                |
| F89            | Unspecified disorder of psychological development          | 103                           | 58             | 45               | <5                            | <5             | <5               |
| F88            | Other disorders of psychological development               | 17                            | 11             | 6                | <5                            | <5             | <5               |
| F80.2          | Mixed receptive-expressive language disorder               | 13                            | 9              | <5               | <5                            | <5             | 0                |
| F80.89         | Other developmental disorders of speech and language       | <5                            | <5             | 0                | 0                             | 0              | 0                |
| F80.4          | Speech and language development delay due to hearing loss  | <5                            | <5             | 0                | 0                             | 0              | 0                |
| F80.0          | Phonological disorder                                      | <5                            | <5             | <5               | 0                             | 0              | 0                |
| F81.9          | Developmental disorder of scholastic skills, unspecified   | <5                            | <5             | 0                | 0                             | 0              | 0                |

**eTable 3.** Sociodemographic and Baseline Clinical Characteristics of Mothers Who Were SARS-CoV-2 Positive or Negative Included in the Pandemic Cohort (March 2020 to May 2021)

| Characteristic                                                | Pregnancy SARS-COV-2<br>Negative<br>N=16715 | Pregnancy SARS-COV-2<br>Positive<br>N=835 | p-value <sup>1</sup> |
|---------------------------------------------------------------|---------------------------------------------|-------------------------------------------|----------------------|
| <b>Maternal age, Median (IQR)</b>                             | 33.0 (30.0 – 36.0)                          | 31.0 (27.0 – 35.0)                        | <0.001               |
| <b>Maternal race, n (%)</b>                                   |                                             |                                           | <0.001               |
| Asian                                                         | 1,716 (10)                                  | 44 (5.3)                                  |                      |
| Black or African American                                     | 1,427 (8.5)                                 | 128 (15)                                  |                      |
| Other                                                         | 1,434 (8.6)                                 | 227 (27)                                  |                      |
| Unknown                                                       | 417 (2.5)                                   | 44 (5.3)                                  |                      |
| White                                                         | 11,721 (70)                                 | 392 (47)                                  |                      |
| <b>Maternal ethnicity, n (%)</b>                              |                                             |                                           | <0.001               |
| Hispanic                                                      | 2,212 (13)                                  | 328 (39)                                  |                      |
| Not Hispanic                                                  | 14,029 (84)                                 | 480 (57)                                  |                      |
| Unavailable                                                   | 466 (2.8)                                   | 27 (3.2)                                  |                      |
| Unknown                                                       | 8                                           | 0                                         |                      |
| <b>Maternal public insurance, n (%)</b>                       | 3,081 (18)                                  | 415 (50)                                  | <0.001               |
| <b>Delivery hospital type, n (%)</b>                          |                                             |                                           | <0.001               |
| Academic medical center                                       | 9,651 (58)                                  | 583 (70)                                  |                      |
| Community hospital                                            | 7,064 (42)                                  | 252 (30)                                  |                      |
| <b>Delivery method, n (%)</b>                                 |                                             |                                           | 0.66                 |
| C-Section                                                     | 5,243 (31)                                  | 268 (32)                                  |                      |
| Vaginal                                                       | 11,472 (69)                                 | 567 (68)                                  |                      |
| <b>Delivery admission length of stay (days), Median (IQR)</b> | 3.00 (2.00 – 3.00)                          | 3.00 (2.00 – 4.00)                        | 0.68                 |
| <b>Pre-term birth, n (%)</b>                                  |                                             |                                           | 0.024                |
| Preterm                                                       | 1,300 (7.8)                                 | 83 (9.9)                                  |                      |
| Term                                                          | 15,415 (92)                                 | 752 (90)                                  |                      |

<sup>1</sup>Wilcoxon rank sum test; Pearson's Chi-squared test

Table 1 in the main text reports offspring characteristics, while this table reports features of mothers.

**eTable 4.** Sociodemographic and Baseline Clinical Characteristics of Offspring of Mothers Who Were SARS-CoV-2 Positive or Negative Included in the Pandemic Cohort (March 2020 to May 2021), Restricted to Offspring With at Least 1 Follow-up Visit at 12 Months ± 60 Days

| Characteristic <sup>1</sup>                                   | No Pediatric Follow-up Visit at 12-months +/- 60 days<br>N=11337 | Pediatric Follow-up Visit at 12-months +/- 60 days<br>N=7018 <sup>1</sup> | p-value <sup>1</sup> |
|---------------------------------------------------------------|------------------------------------------------------------------|---------------------------------------------------------------------------|----------------------|
| <b>Delivery hospital type, n (%)</b>                          |                                                                  |                                                                           | 0.55                 |
| Academic medical center                                       | 6,657 (59)                                                       | 4,152 (59)                                                                |                      |
| Community hospital                                            | 4,680 (41)                                                       | 2,866 (41)                                                                |                      |
| <b>Maternal age, Mean (SD)</b>                                | 32.9 (4.9)                                                       | 33.1 (4.9)                                                                | 0.004                |
| <b>Maternal race, n (%)</b>                                   |                                                                  |                                                                           | <0.001               |
| Asian                                                         | 1,059 (9.3)                                                      | 750 (11)                                                                  |                      |
| Black or African American                                     | 1,178 (10)                                                       | 457 (6.5)                                                                 |                      |
| Other                                                         | 952 (8.4)                                                        | 762 (11)                                                                  |                      |
| Unknown                                                       | 291 (2.6)                                                        | 188 (2.7)                                                                 |                      |
| White                                                         | 7,857 (69)                                                       | 4,861 (69)                                                                |                      |
| <b>Maternal ethnicity, n (%)</b>                              |                                                                  |                                                                           | <0.001               |
| Hispanic                                                      | 1,492 (13)                                                       | 1,125 (16)                                                                |                      |
| Not Hispanic                                                  | 9,520 (84)                                                       | 5,693 (81)                                                                |                      |
| Unavailable                                                   | 318 (2.8)                                                        | 199 (2.8)                                                                 |                      |
| Unknown                                                       | 7                                                                | 1                                                                         |                      |
| <b>Offspring sex, n (%)</b>                                   |                                                                  |                                                                           | 0.030                |
| Female                                                        | 5,603 (49)                                                       | 3,353 (48)                                                                |                      |
| Male                                                          | 5,734 (51)                                                       | 3,665 (52)                                                                |                      |
| <b>Maternal public insurance, n (%)</b>                       | 2,096 (18)                                                       | 1,497 (21)                                                                | <0.001               |
| <b>Pre-term birth, n (%)</b>                                  |                                                                  |                                                                           | <0.001               |
| Preterm                                                       | 1,078 (9.5)                                                      | 779 (11)                                                                  |                      |
| Term                                                          | 10,259 (90)                                                      | 6,239 (89)                                                                |                      |
| <b>Delivery admission length of stay (days), Median (IQR)</b> | 3.00 (2.00 – 4.00)                                               | 3.00 (2.00 – 4.00)                                                        | 0.050                |
| <b>Multiple births, n (%)</b>                                 | 687 (6.1)                                                        | 483 (6.9)                                                                 | 0.027                |

<sup>1</sup>Pearson's Chi-squared test; Wilcoxon rank sum test



**eTable 5.** Coarsened Exact Matching of Mothers With or Without SARS-CoV-2 Exposure

| <b>Coarsened exact match analysis</b> | <b>Odds ratio</b> | <b>95% Confidence interval</b> | <b>p-value</b> |
|---------------------------------------|-------------------|--------------------------------|----------------|
| Matched offspring - 12m Male          | 1.83              | (0.97-3.16)                    | 0.04           |
| Matched offspring - 12m Female        | 1.22              | (0.51-2.47)                    | 0.62           |
| Matched offspring - 12m ALL           | 1.56              | (0.95-2.41)                    | 0.06           |

**eTable 6.** Sociodemographic and Baseline Clinical Characteristics of Offspring With Mothers Who Were SARS-CoV-2 Positive or Negative Included in the Pandemic Cohort (March 2020 to May 2021), Restricted to Offspring With at Least 1 Follow-up Visit at 18 Months ± 60 Days

| Characteristic <sup>1</sup>                                   | No Pediatric Follow-up Visit at 18-months +/- 60 days<br>N=9180 <sup>1</sup> | Pediatric Follow-up Visit at 18-months +/- 60 days<br>N=4827 <sup>1</sup> | p-value <sup>1</sup> |
|---------------------------------------------------------------|------------------------------------------------------------------------------|---------------------------------------------------------------------------|----------------------|
| <b>Delivery hospital type, n (%)</b>                          |                                                                              |                                                                           | <0.001               |
| Academic medical center                                       | 5,341 (58)                                                                   | 2,957 (61)                                                                |                      |
| Community hospital                                            | 3,839 (42)                                                                   | 1,870 (39)                                                                |                      |
| <b>Maternal age, Mean (SD)</b>                                | 32.8 (4.9)                                                                   | 33.1 (4.9)                                                                | 0.002                |
| <b>Maternal race, n (%)</b>                                   |                                                                              |                                                                           | <0.001               |
| Asian                                                         | 895 (9.7)                                                                    | 509 (11)                                                                  |                      |
| Black or African American                                     | 926 (10)                                                                     | 329 (6.8)                                                                 |                      |
| Other                                                         | 792 (8.6)                                                                    | 557 (12)                                                                  |                      |
| Unknown                                                       | 254 (2.8)                                                                    | 115 (2.4)                                                                 |                      |
| White                                                         | 6,313 (69)                                                                   | 3,317 (69)                                                                |                      |
| <b>Maternal ethnicity, n (%)</b>                              |                                                                              |                                                                           | <0.001               |
| Hispanic                                                      | 1,216 (13)                                                                   | 814 (17)                                                                  |                      |
| Not Hispanic                                                  | 7,694 (84)                                                                   | 3,867 (80)                                                                |                      |
| Unavailable                                                   | 267 (2.9)                                                                    | 145 (3.0)                                                                 |                      |
| Unknown                                                       | 3                                                                            | 1                                                                         |                      |
| <b>Offspring sex, n (%)</b>                                   |                                                                              |                                                                           | 0.020                |
| Female                                                        | 4,574 (50)                                                                   | 2,305 (48)                                                                |                      |
| Male                                                          | 4,606 (50)                                                                   | 2,522 (52)                                                                |                      |
| <b>Maternal public insurance, n (%)</b>                       | 1,650 (18)                                                                   | 1,047 (22)                                                                | <0.001               |
| <b>Pre-term birth, n (%)</b>                                  |                                                                              |                                                                           | 0.015                |
| Preterm                                                       | 886 (9.7)                                                                    | 529 (11)                                                                  |                      |
| Term                                                          | 8,294 (90)                                                                   | 4,298 (89)                                                                |                      |
| <b>Delivery admission length of stay (days), Median (IQR)</b> | 3.00 (2.00 – 4.00)                                                           | 3.00 (2.00 – 4.00)                                                        | 0.26                 |
| <b>Multiple births, n (%)</b>                                 | 547 (6.0)                                                                    | 342 (7.1)                                                                 | 0.009                |

<sup>1</sup>Pearson's Chi-squared test; Wilcoxon rank sum test

**eTable 7.** Sociodemographic and Baseline Clinical Characteristics of Offspring Who Were Born During the Pandemic (March 2020 to May 2021), Compared With Those Born in 2018

| Characteristic                                                | Births in 2018<br>N=13952 | Pandemic births<br>N=18355 | p-value <sup>1</sup> |
|---------------------------------------------------------------|---------------------------|----------------------------|----------------------|
| <b>Delivery hospital type, n (%)</b>                          |                           |                            | <0.001               |
| Academic medical center                                       | 8,954 (64)                | 10,809 (59)                |                      |
| Community hospital                                            | 4,998 (36)                | 7,546 (41)                 |                      |
| <b>Maternal age, Mean (SD)</b>                                | 33.0 (4.9)                | 33.0 (4.9)                 | 0.74                 |
| <b>Maternal race, n (%)</b>                                   |                           |                            | <0.001               |
| Asian                                                         | 1,544 (11)                | 1,809 (9.9)                |                      |
| Black or African American                                     | 1,320 (9.5)               | 1,635 (8.9)                |                      |
| Other                                                         | 1,335 (9.6)               | 1,714 (9.3)                |                      |
| Unknown                                                       | 430 (3.1)                 | 479 (2.6)                  |                      |
| White                                                         | 9,323 (67)                | 12,718 (69)                |                      |
| <b>Maternal ethnicity, n (%)</b>                              |                           |                            | <0.001               |
| Hispanic                                                      | 2,032 (15)                | 2,617 (14)                 |                      |
| Not Hispanic                                                  | 11,284 (81)               | 15,213 (83)                |                      |
| Unavailable                                                   | 636 (4.6)                 | 517 (2.8)                  |                      |
| Unknown                                                       | 0                         | 8                          |                      |
| <b>Offspring sex, n (%)</b>                                   |                           |                            | 0.22                 |
| Female                                                        | 6,904 (49)                | 8,956 (49)                 |                      |
| Male                                                          | 7,048 (51)                | 9,399 (51)                 |                      |
| <b>Maternal public insurance, n (%)</b>                       | 2,714 (19)                | 3,593 (20)                 | 0.78                 |
| <b>Delivery method, n (%)</b>                                 |                           |                            | 0.87                 |
| C-Section                                                     | 4,596 (33)                | 6,031 (33)                 |                      |
| Vaginal                                                       | 9,356 (67)                | 12,324 (67)                |                      |
| <b>Pre-term birth, n (%)</b>                                  |                           |                            | 0.003                |
| Preterm                                                       | 1,555 (11)                | 1,857 (10)                 |                      |
| Term                                                          | 12,397 (89)               | 16,498 (90)                |                      |
| <b>Delivery admission length of stay (days), Median (IQR)</b> | 3.00 (2.00 – 4.00)        | 3.00 (2.00 – 4.00)         | <0.001               |
| <b>Multiple births, n (%)</b>                                 | 1,065 (7.6)               | 1,170 (6.4)                | <0.001               |

<sup>1</sup>Pearson's Chi-squared test; Wilcoxon rank sum test

**eTable 8.** Neurodevelopmental Diagnostic Codes of Offspring Who Were Born During the Pandemic (March 2020 to May 2021), Compared With Those Born in 2018 or 2019

| ICD-10CD | Description                                                | Live births in 2018 |                |                  | Live births in 2019 |                |                  |
|----------|------------------------------------------------------------|---------------------|----------------|------------------|---------------------|----------------|------------------|
|          |                                                            | All offspring       | Male offspring | Female offspring | All offspring       | Male offspring | Female offspring |
| F82      | Specific developmental disorder of motor function          | 108                 | 50             | 58               | 118                 | 56             | 62               |
| F80.9    | Developmental disorder of speech and language, unspecified | 54                  | 33             | 21               | 55                  | 35             | 20               |
| F80.1    | Expressive language disorder                               | 35                  | 25             | 10               | 39                  | 23             | 16               |
| F89      | Unspecified disorder of psychological development          | 23                  | 16             | 7                | 23                  | 15             | 8                |
| F88      | Other disorders of psychological development               | 13                  | 8              | 5                | 8                   | 7              | <5               |
| F80.0    | Phonological disorder                                      | <5                  | 0              | <5               | <5                  | <5             | 0                |
| F80.2    | Mixed receptive-expressive language disorder               | 0                   | 0              | 0                | <5                  | 0              | <5               |
| F80.89   | Other developmental disorders of speech and language       | <5                  | <5             | 0                | <5                  | <5             | 0                |
| F80.4    | Speech and language development delay due to hearing loss  | <5                  | <5             | <5               | <5                  | <5             | 0                |
| F80.81   | Childhood onset fluency disorder                           | <5                  | <5             | 0                | 0                   | 0              | 0                |

**eTable 9.** Sociodemographic and Baseline Clinical Characteristics of Offspring Who Were Born During the Pandemic (March 2020 to May 2021), Compared With Those Born in 2019

| Characteristic                                                | Births in 2019<br>N=15386 | Pandemic births<br>N=18355 | p-value <sup>1</sup> |
|---------------------------------------------------------------|---------------------------|----------------------------|----------------------|
| <b>Delivery hospital type, n (%)</b>                          |                           |                            | <0.001               |
| Academic medical center                                       | 9,672 (63)                | 10,809 (59)                |                      |
| Community hospital                                            | 5,714 (37)                | 7,546 (41)                 |                      |
| <b>Maternal age, Mean (SD)</b>                                | 33.1 (4.9)                | 33.0 (4.9)                 | 0.30                 |
| <b>Maternal race, n (%)</b>                                   |                           |                            | <0.001               |
| Asian                                                         | 1,740 (11)                | 1,809 (9.9)                |                      |
| Black or African American                                     | 1,367 (8.9)               | 1,635 (8.9)                |                      |
| Other                                                         | 1,510 (9.8)               | 1,714 (9.3)                |                      |
| Unknown                                                       | 464 (3.0)                 | 479 (2.6)                  |                      |
| White                                                         | 10,305 (67)               | 12,718 (69)                |                      |
| <b>Maternal ethnicity, n (%)</b>                              |                           |                            | 0.081                |
| Hispanic                                                      | 2,308 (15)                | 2,617 (14)                 |                      |
| Not Hispanic                                                  | 12,610 (82)               | 15,213 (83)                |                      |
| Unavailable                                                   | 462 (3.0)                 | 517 (2.8)                  |                      |
| Unknown                                                       | 6                         | 8                          |                      |
| <b>Offspring sex, n (%)</b>                                   |                           |                            | 0.094                |
| Female                                                        | 7,648 (50)                | 8,956 (49)                 |                      |
| Male                                                          | 7,738 (50)                | 9,399 (51)                 |                      |
| <b>Delivery Method, n (%)</b>                                 |                           |                            | 0.74                 |
| C-Section                                                     | 5,029 (33)                | 6,031 (33)                 |                      |
| Vaginal                                                       | 10,357 (67)               | 12,324 (67)                |                      |
| <b>Pre-term birth, n (%)</b>                                  |                           |                            | 0.005                |
| Preterm                                                       | 1,701 (11)                | 1,857 (10)                 |                      |
| Term                                                          | 13,685 (89)               | 16,498 (90)                |                      |
| <b>Delivery admission length of stay (days), Median (IQR)</b> | 3.00 (2.00 – 4.00)        | 3.00 (2.00 – 4.00)         | <0.001               |
| <b>Multiple births, n (%)</b>                                 | 1,071 (7.0)               | 1,170 (6.4)                | 0.031                |

<sup>1</sup>Pearson's Chi-squared test; Wilcoxon rank sum test

?

?

**eFigure 1.** Multiple Logistic Regression Forest Plot of Neurodevelopmental Diagnosis Within 12 Months in Offspring Associated With Maternal COVID-19 Status, Without Adjustment for Preterm Birth

### A. Male offspring

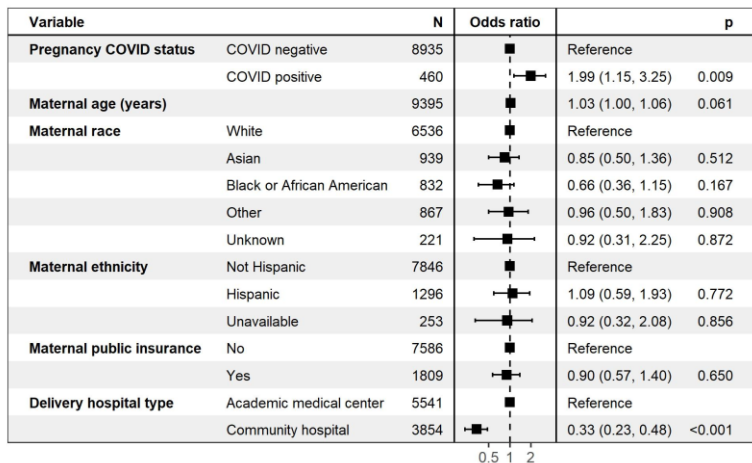

### B. Female offspring

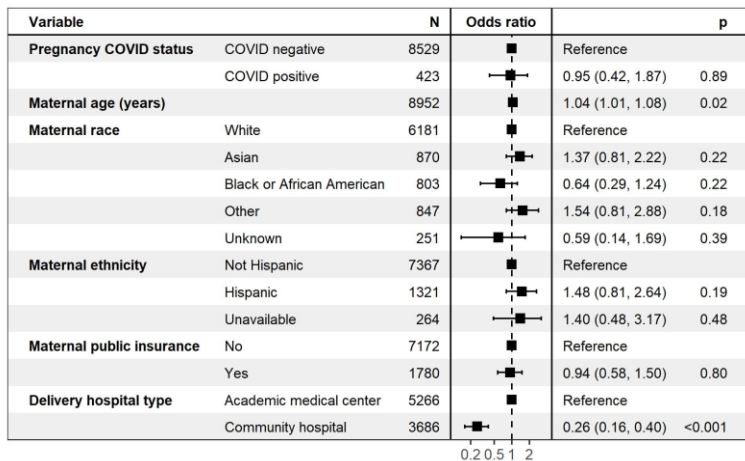

### C. All offspring

| Variable                         | N                         | Odds ratio              | p                        |
|----------------------------------|---------------------------|-------------------------|--------------------------|
| <b>Pregnancy COVID status</b>    | COVID negative            | 17464                   | Reference                |
|                                  | COVID positive            | 883                     | 1.49 (0.96, 2.22) 0.064  |
| <b>Maternal age (years)</b>      | 18347                     | 1.04 (1.01, 1.06) 0.004 |                          |
| <b>Maternal race</b>             | White                     | 12717                   | Reference                |
|                                  | Asian                     | 1809                    | 1.05 (0.73, 1.48) 0.775  |
|                                  | Black or African American | 1635                    | 0.65 (0.41, 1.00) 0.065  |
|                                  | Other                     | 1714                    | 1.21 (0.77, 1.89) 0.409  |
|                                  | Unknown                   | 472                     | 0.75 (0.33, 1.51) 0.462  |
| <b>Maternal ethnicity</b>        | Not Hispanic              | 15213                   | Reference                |
|                                  | Hispanic                  | 2617                    | 1.27 (0.83, 1.90) 0.263  |
|                                  | Unavailable               | 517                     | 1.13 (0.55, 2.04) 0.721  |
| <b>Maternal public insurance</b> | No                        | 14758                   | Reference                |
|                                  | Yes                       | 3589                    | 0.92 (0.66, 1.26) 0.600  |
| <b>Delivery hospital type</b>    | Academic medical center   | 10807                   | Reference                |
|                                  | Community hospital        | 7540                    | 0.30 (0.22, 0.40) <0.001 |
| <b>Offspring sex</b>             | Female                    | 8952                    | Reference                |
|                                  | Male                      | 9395                    | 1.25 (1.00, 1.55) 0.046  |

0.5 11.52

**eFigure 2.** Multiple Logistic Regression Forest Plot of Neurodevelopmental Diagnosis Within 12 Months in Offspring Associated With Maternal COVID-19 Status, With Cohort Restricted to Offspring With at Least 1 Follow-up Visit at 12 Months  $\pm$  60 Days

### A. Male offspring

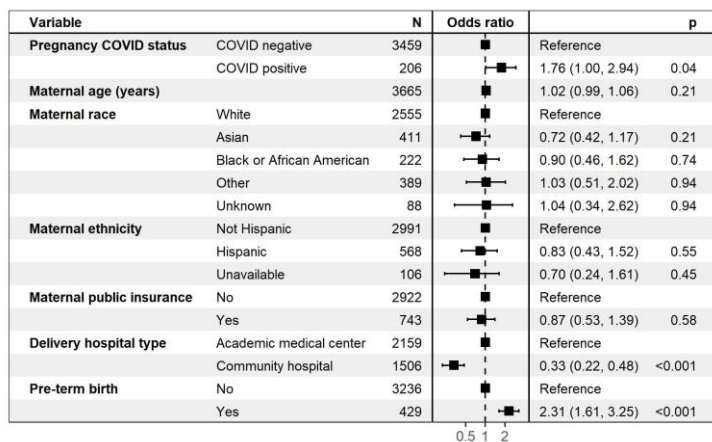

### B. Female offspring

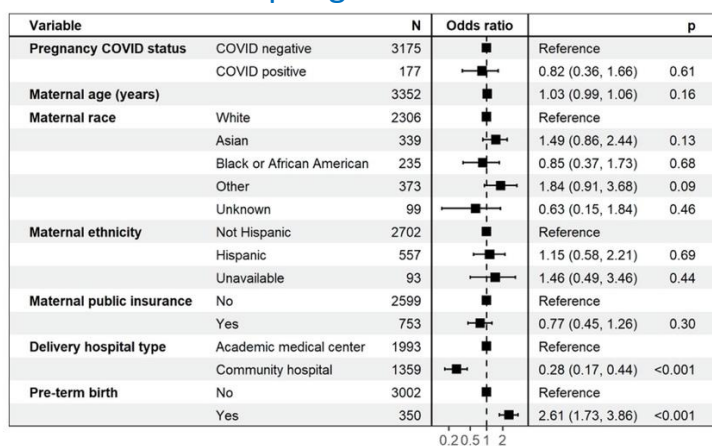

### C. All offspring



| Variable                         |                           | N    | Odds ratio |                   | p      |
|----------------------------------|---------------------------|------|------------|-------------------|--------|
| <b>Pregnancy COVID status</b>    | COVID negative            | 6634 |            | Reference         |        |
|                                  | COVID positive            | 383  |            | 1.31 (0.83, 1.99) | 0.22   |
| <b>Maternal age (years)</b>      |                           | 7017 |            | 1.02 (1.00, 1.05) | 0.06   |
| <b>Maternal race</b>             | White                     | 4861 |            | Reference         |        |
|                                  | Asian                     | 750  |            | 0.98 (0.67, 1.39) | 0.92   |
|                                  | Black or African American | 457  |            | 0.88 (0.53, 1.39) | 0.59   |
|                                  | Other                     | 762  |            | 1.36 (0.84, 2.19) | 0.21   |
|                                  | Unknown                   | 187  |            | 0.81 (0.35, 1.65) | 0.60   |
| <b>Maternal ethnicity</b>        | Not Hispanic              | 5693 |            | Reference         |        |
|                                  | Hispanic                  | 1125 |            | 0.97 (0.61, 1.51) | 0.89   |
|                                  | Unavailable               | 199  |            | 0.97 (0.47, 1.79) | 0.93   |
| <b>Maternal public insurance</b> | No                        | 5521 |            | Reference         |        |
|                                  | Yes                       | 1496 |            | 0.82 (0.58, 1.16) | 0.27   |
| <b>Delivery hospital type</b>    | Academic medical center   | 4152 |            | Reference         |        |
|                                  | Community hospital        | 2865 |            | 0.31 (0.23, 0.41) | <0.001 |
| <b>Offspring sex</b>             | Female                    | 3352 |            | Reference         |        |
|                                  | Male                      | 3665 |            | 1.21 (0.97, 1.52) | 0.09   |
| <b>Pre-term birth</b>            | No                        | 6238 |            | Reference         |        |
|                                  | Yes                       | 779  |            | 2.40 (1.84, 3.11) | <0.001 |

0.5 1 2

**eFigure 3.** Multiple Logistic Regression Forest Plot of Neurodevelopmental Diagnosis Within 18 Months in Offspring Associated With Maternal COVID-19 Status, Without Adjustment for Preterm Birth

### A. Male offspring

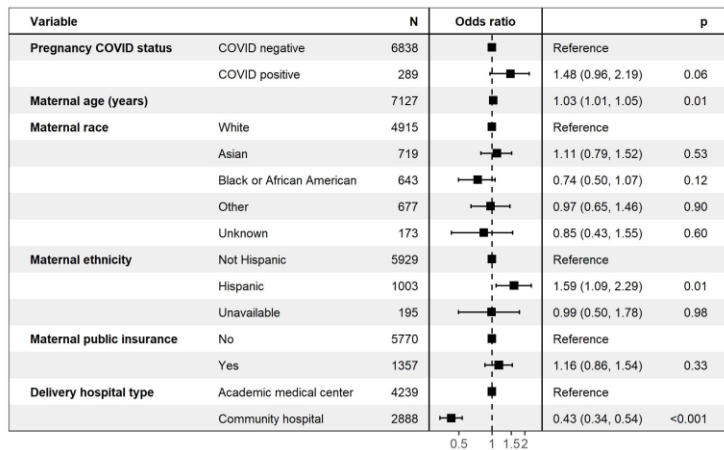

### B. Female offspring

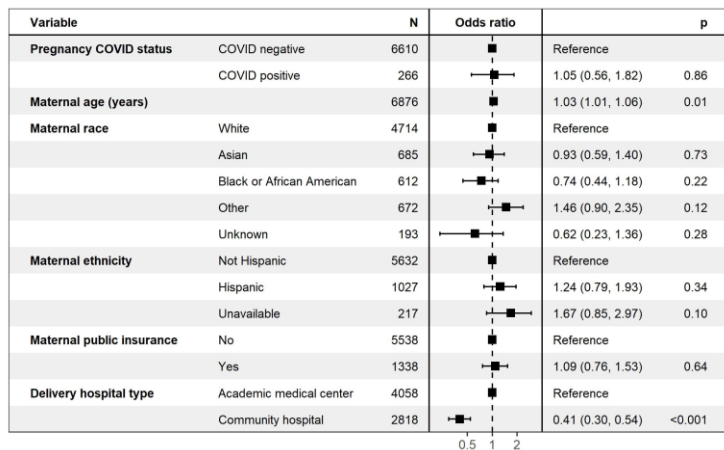

### C. All offspring

| Variable                  |                           | N     | Odds ratio |                   | p      |
|---------------------------|---------------------------|-------|------------|-------------------|--------|
| Pregnancy COVID status    | COVID negative            | 13448 |            | Reference         |        |
|                           | COVID positive            | 555   |            | 1.32 (0.93, 1.82) | 0.10   |
| Maternal age (years)      |                           | 14003 |            | 1.03 (1.01, 1.05) | <0.001 |
| Maternal race             | White                     | 9629  |            | Reference         |        |
|                           | Asian                     | 1404  |            | 1.04 (0.80, 1.33) | 0.78   |
|                           | Black or African American | 1255  |            | 0.74 (0.54, 0.99) | 0.05   |
|                           | Other                     | 1349  |            | 1.15 (0.84, 1.57) | 0.37   |
|                           | Unknown                   | 366   |            | 0.77 (0.45, 1.25) | 0.31   |
| Maternal ethnicity        | Not Hispanic              | 11561 |            | Reference         |        |
|                           | Hispanic                  | 2030  |            | 1.44 (1.08, 1.91) | 0.01   |
|                           | Unavailable               | 412   |            | 1.27 (0.79, 1.92) | 0.30   |
| Maternal public insurance | No                        | 11308 |            | Reference         |        |
|                           | Yes                       | 2695  |            | 1.13 (0.90, 1.41) | 0.28   |
| Delivery hospital type    | Academic medical center   | 8297  |            | Reference         |        |
|                           | Community hospital        | 5706  |            | 0.42 (0.35, 0.50) | <0.001 |
| Offspring sex             | Female                    | 6876  |            | Reference         |        |
|                           | Male                      | 7127  |            | 1.59 (1.37, 1.87) | <0.001 |

0.5 1 1.5

**eFigure 4.** Multiple Logistic Regression Forest Plot of Neurodevelopmental Diagnosis Within 18 Months in Offspring Associated With Maternal COVID-19 Status, With Cohort Restricted to Offspring With at Least 1 Follow-up Visit at 18 Months ± 60 Days

### A. Male offspring

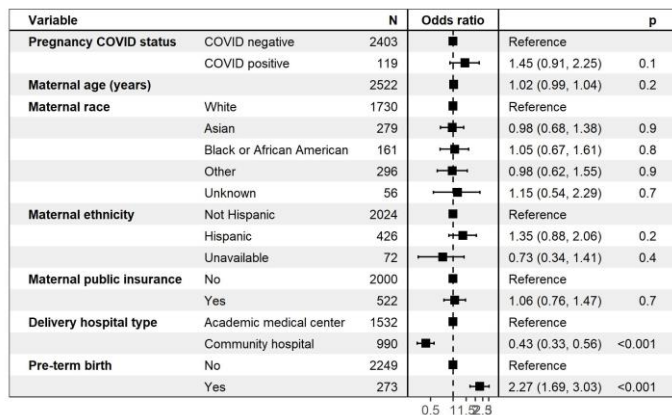

### B. Female offspring

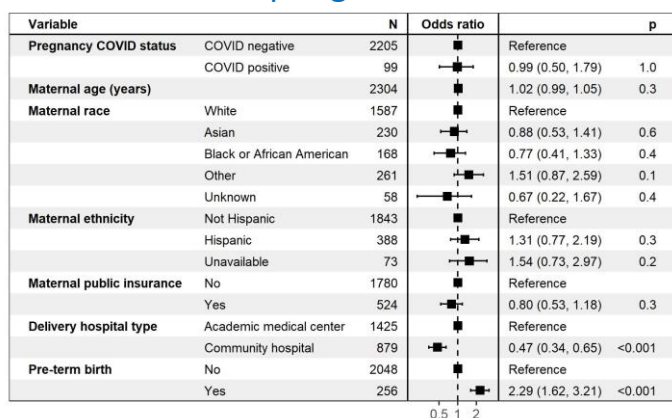

### C. All offspring

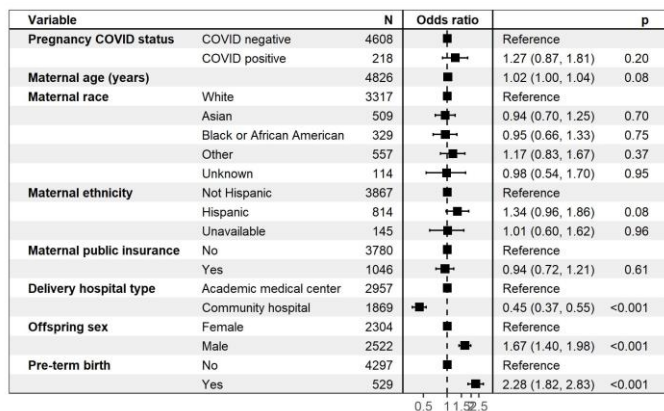

**eFigure 5.** Multiple Logistic Regression Forest Plot of Neurodevelopmental Diagnosis Within 12 Months in Offspring Associated With Period of Birth (Pandemic vs 2018)

### A. Male offspring

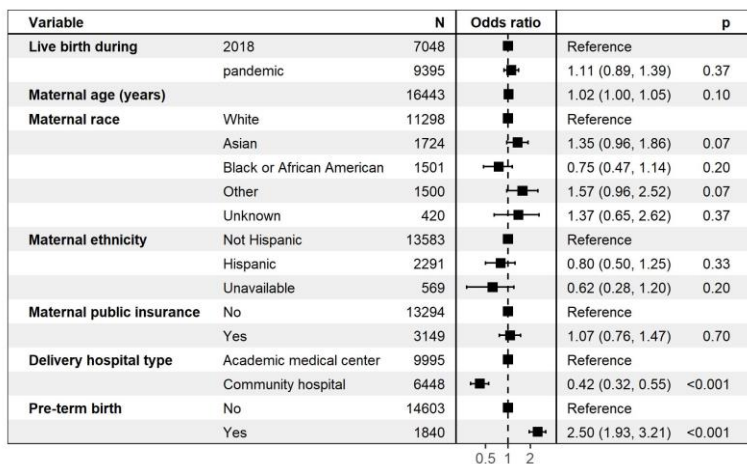

### B. Female offspring

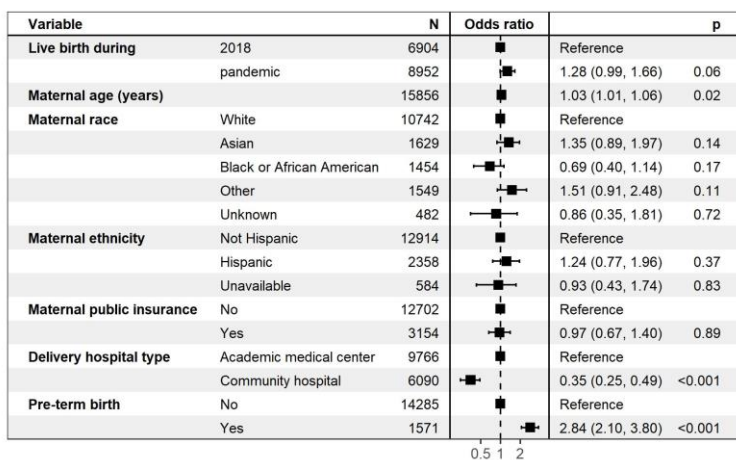

### C. All offspring

| Variable                  |                           | N     | Odds ratio |                   | p      |
|---------------------------|---------------------------|-------|------------|-------------------|--------|
| Live birth during         | 2018                      | 13952 |            | Reference         |        |
|                           | pandemic                  | 18347 |            | 1.18 (0.99, 1.39) | 0.060  |
| Maternal age (years)      |                           | 32299 |            | 1.03 (1.01, 1.04) | 0.004  |
| Maternal race             | White                     | 22040 |            | Reference         |        |
|                           | Asian                     | 3353  |            | 1.35 (1.04, 1.73) | 0.020  |
|                           | Black or African American | 2955  |            | 0.73 (0.51, 1.01) | 0.064  |
|                           | Other                     | 3049  |            | 1.54 (1.08, 2.17) | 0.015  |
|                           | Unknown                   | 902   |            | 1.11 (0.63, 1.82) | 0.698  |
| Maternal ethnicity        | Not Hispanic              | 26497 |            | Reference         |        |
|                           | Hispanic                  | 4649  |            | 0.98 (0.70, 1.35) | 0.903  |
|                           | Unavailable               | 1153  |            | 0.76 (0.44, 1.21) | 0.273  |
| Maternal public insurance | No                        | 25996 |            | Reference         |        |
|                           | Yes                       | 6303  |            | 1.02 (0.80, 1.30) | 0.859  |
| Delivery hospital type    | Academic medical center   | 19761 |            | Reference         |        |
|                           | Community hospital        | 12538 |            | 0.39 (0.31, 0.48) | <0.001 |
| Offspring sex             | Female                    | 15856 |            | Reference         |        |
|                           | Male                      | 16443 |            | 1.28 (1.08, 1.51) | 0.004  |
| Pre-term birth            | No                        | 28888 |            | Reference         |        |
|                           | Yes                       | 3411  |            | 2.63 (2.16, 3.18) | <0.001 |

0.5 1 2

**eFigure 6.** Multiple Logistic Regression Forest Plot of Neurodevelopmental Diagnosis Within 12 Months in Offspring Associated With Period of Birth (Pandemic vs 2019)

### A. Male offspring

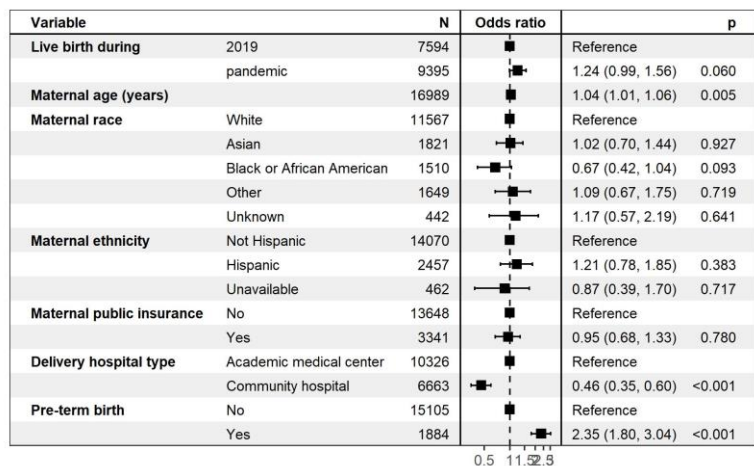

### B. Female offspring

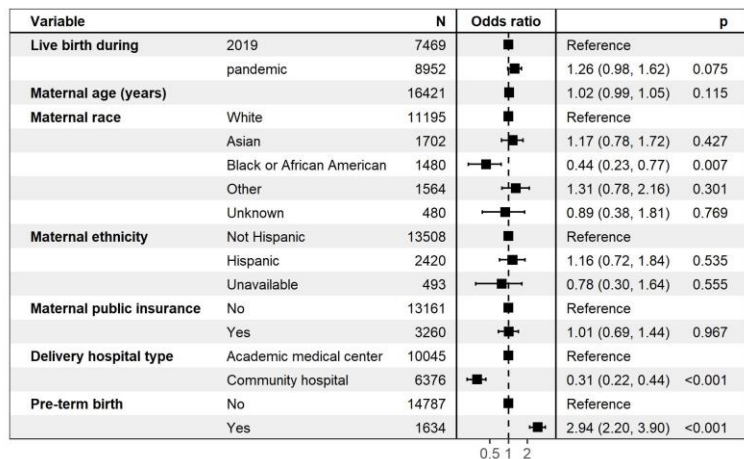

### C. All offspring

| Variable                  |                           | N     | Odds ratio        | p      |
|---------------------------|---------------------------|-------|-------------------|--------|
| Live birth during         | 2019                      | 15063 | Reference         |        |
|                           | pandemic                  | 18347 | 1.24 (1.05, 1.47) | 0.010  |
| Maternal age (years)      |                           | 33410 | 1.03 (1.01, 1.05) | 0.002  |
| Maternal race             | White                     | 22762 | Reference         |        |
|                           | Asian                     | 3523  | 1.08 (0.82, 1.40) | 0.569  |
|                           | Black or African American | 2990  | 0.57 (0.39, 0.80) | 0.002  |
|                           | Other                     | 3213  | 1.20 (0.84, 1.69) | 0.313  |
|                           | Unknown                   | 922   | 1.04 (0.61, 1.68) | 0.878  |
| Maternal ethnicity        | Not Hispanic              | 27578 | Reference         |        |
|                           | Hispanic                  | 4877  | 1.18 (0.85, 1.62) | 0.305  |
|                           | Unavailable               | 955   | 0.83 (0.46, 1.38) | 0.504  |
| Maternal public insurance | No                        | 26809 | Reference         |        |
|                           | Yes                       | 6601  | 0.98 (0.76, 1.25) | 0.870  |
| Delivery hospital type    | Academic medical center   | 20371 | Reference         |        |
|                           | Community hospital        | 13039 | 0.39 (0.32, 0.49) | <0.001 |
| Offspring sex             | Female                    | 16421 | Reference         |        |
|                           | Male                      | 16989 | 1.21 (1.03, 1.43) | 0.024  |
| Pre-term birth            | No                        | 29892 | Reference         |        |
|                           | Yes                       | 3518  | 2.59 (2.13, 3.14) | <0.001 |

0.5 1 1.5 2
