# Supplementary material for: Sex-Specific Neurodevelopmental Outcomes Among Offspring of Mothers With SARS-CoV-2 Infection During Pregnancy
Source: PubMed Central journal article supplement (PMC10037162; doi:10.1001/jamanetworkopen.2023.4415), 2023-03-23
Supplement: jamanetwopen-e234415-s002.pdf [file jamanetwopen-e234415-s002.pdf]

## Data Sharing Statement

Edlow. Sex-Specific Neurodevelopmental Outcomes Among Offspring of Mothers With SARS-CoV-2 Infection During Pregnancy. *JAMA Netw Open*. Published March 23, 2023.  
doi:10.1001/jamanetworkopen.2023.4415

### Data

**Data available:** No

### Additional Information

**Explanation for why data not available:** IRB does not allow distribution of EHR data
